# Supplementary material for: Decylprodigiosin: a new member of the prodigiosin family isolated from a seaweed-associated Streptomyces
Source: PubMed Central journal article supplement (PMC10991731; doi:10.3389/fphar.2024.1347485), 2024-03-21
Supplement: DataSheet1.pdf [file DataSheet1.pdf]

## Supplementary Material

### Supplementary Figures and Tables

**Table S1.** Reverse-phase VLC conditions of strain CT-F61 crude extract.

| Fraction | MeOH (%) | H <sub>2</sub> O (%) | Volume (mL) |
|----------|----------|----------------------|-------------|
| A        | 5        | 95                   | 500         |
| B        | 10       | 90                   | 500         |
| C        | 20       | 80                   | 500         |
| D        | 30       | 70                   | 500         |
| E        | 40       | 60                   | 500         |
| F        | 50       | 50                   | 500         |
| G        | 70       | 30                   | 500         |
| H        | 90       | 10                   | 500         |
| I        | 100      | 0                    | 750         |
| J        | 100 IPA  | -                    | 1000        |
| K        | 100 DCM  | -                    | 1000        |
| L        | 100 AC   | -                    | 500         |
| M        | 100      | 0                    | 750         |

MeOH: metanol; H<sub>2</sub>O: water; IPA: isopropanol;  
DCM: dicloromethane; AC: acetone

**Table S2.** Reverse-phase semi-preparative HPLC conditions of CT-F61 KL sample.

| Time (min) | % H <sub>2</sub> O | % MeOH | % IPA |
|------------|--------------------|--------|-------|
| 0.00       | 70                 | 30     | 0     |
| 12.00      | 0                  | 100    | 0     |
| 25.00      | 0                  | 30     | 70    |
| 27.00      | 0                  | 20     | 80    |
| 42.0       | 0                  | 20     | 80    |
| 44.0       | 0                  | 100    | 0     |
| 45.0       | 7                  | 30     | 0     |
| 46.0       | 70                 | 30     | 0     |

MeOH: metanol; H<sub>2</sub>O: water; IPA: isopropanol

**Supplementary Figure 1.** Reverse-phase HPLC chromatogram of CT-F61 KL sample with the indication of the recovered fractions.

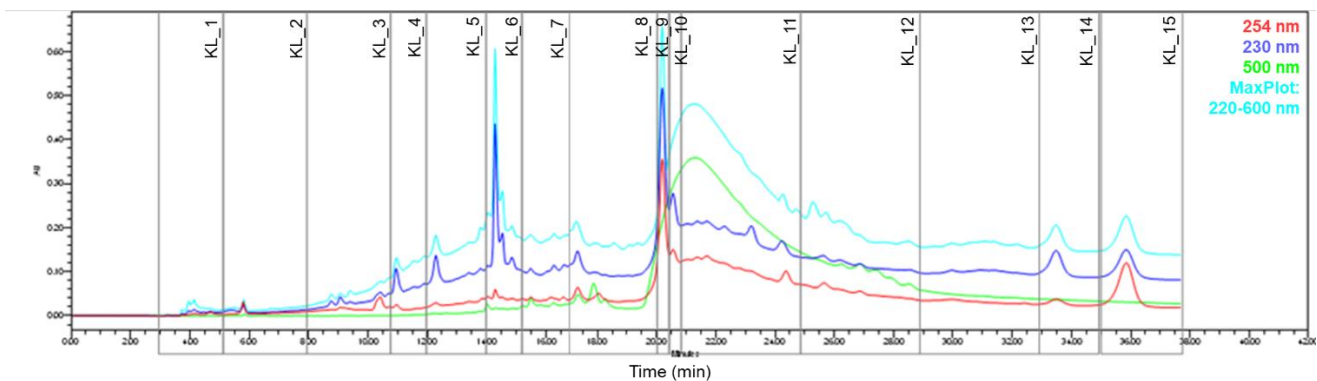

**Table S3.** Reverse-phase analytical HPLC conditions of CT-F61 KL\_9-10 sample. Column used: ACE Excel 3 Super C18 V19-3214 75x4.6 mm.

| Time (min) | % H <sub>2</sub> O | % MeOH | % IPA |
|------------|--------------------|--------|-------|
| 0.01       | 50                 | 50     | 0     |
| 18.00      | 0                  | 100    | 0     |
| 23.00      | 0                  | 70     | 30    |
| 30.00      | 0                  | 70     | 30    |
| 33.0       | 50                 | 50     | 0     |
| 37.0       | 50                 | 50     | 0     |

MeOH: metanol; H<sub>2</sub>O: water; IPA: isopropanol

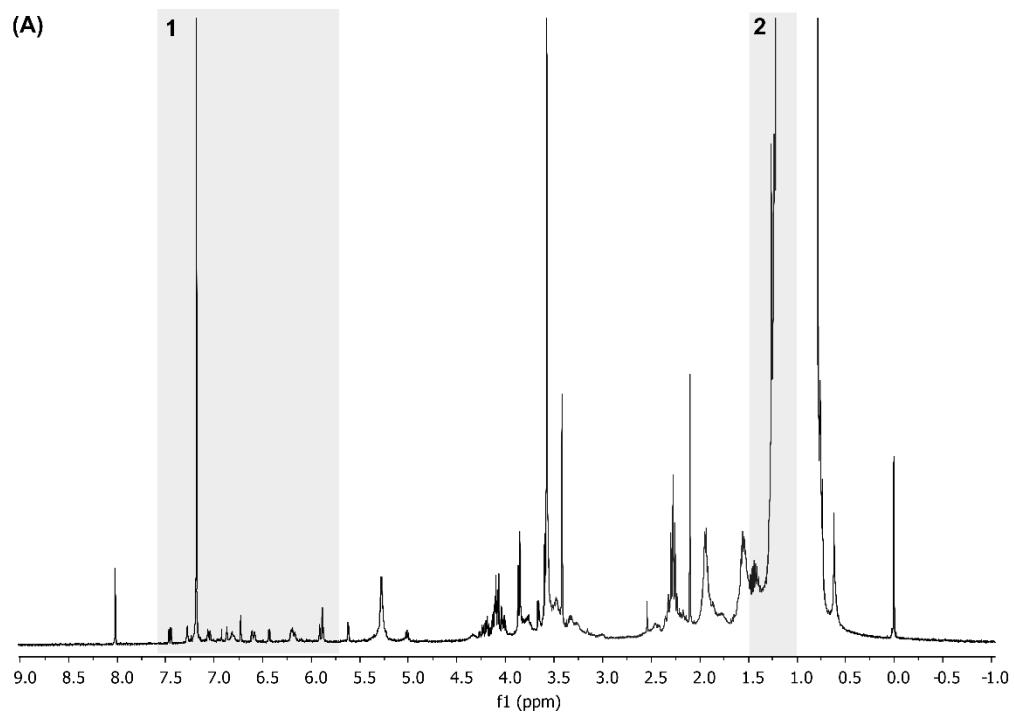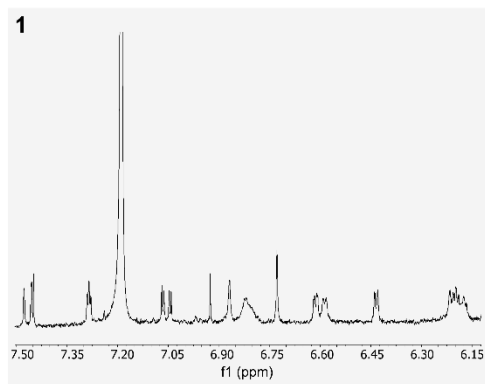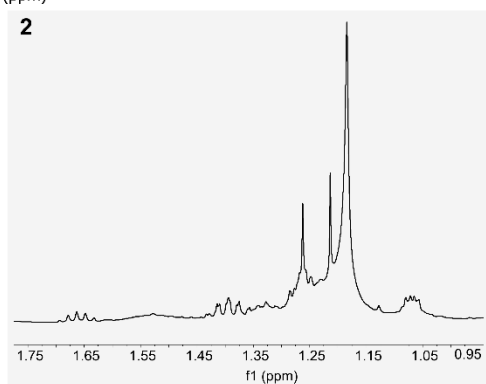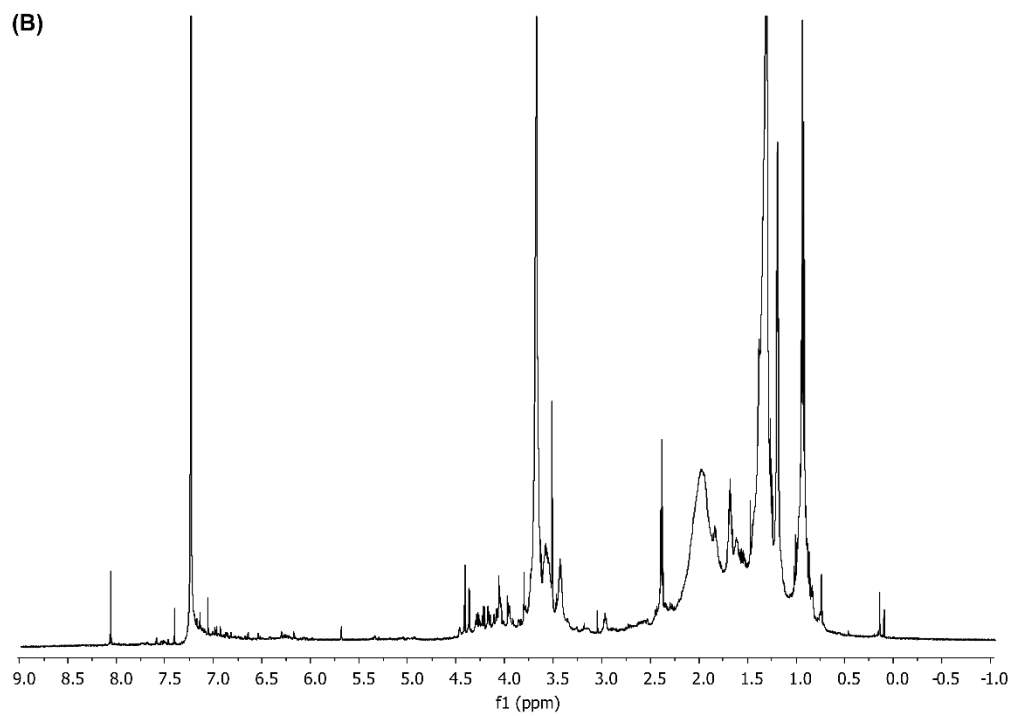

**Supplementary Figure 2.**  $^1\text{H}$  NMR (Chloroform-d, 600 MHz) spectrum of fraction KL\_9 containing semipurified **1**, highlighting the typical prodigiosin signals  $\delta_{\text{H}}$  7.5-6.20, associated to the pyrrole rings (**A**) and  $\delta_{\text{H}}$  1.29-1.25, consistent with a large methylene envelope (**B**).  $^1\text{H}$  NMR (Chloroform-d, 600 MHz) spectrum of the most purified fraction (KL\_9-10\_A) containing **1** (**C**).
